# Supplementary material
Source: PubMed Central journal article supplement (PMC5885913)
Supplement: jama-319-906-s001.pdf [file jama-319-906-s001.pdf]

## Supplementary Online Content

Glanz JM, Newcomer SR, Daley MF, et al. Association between estimated cumulative vaccine antigen exposure through the first 23 months of life and non-vaccine-targeted infections from 24 through 47 months of age. *JAMA*. doi:10.1001/jama.2018.0708

**eTable 1.** ICD-9 and ICD-10 Codes for Infections Not Targeted by Early Childhood Vaccines

**eTable 2.** ICD-9 and ICD-10 Codes for Excluded Infections Targeted by Early Childhood Vaccines

**eTable 3.** Number of Antibody-Stimulating Protein and Polysaccharide Antigens in Early Childhood Vaccines Recommended by the US Advisory Committee on Immunization Practices

**eTable 4.** Common Combinations of Estimated Cumulative Vaccine Antigen Exposure from Birth Through 23 Months, by Decile of Exposure

**eTable 5.** Estimated Cumulative Vaccine Antigen Amounts from Birth Through 23 Months, by Birth Year Period

**eTable 6.** Quantitative Bias Analysis for Potential Exposure Misclassification

**eTable 7.** Association Between Estimated Vaccine Antigen Exposure and Non-Vaccine-Targeted Infections, With Exposures as Estimated Cumulative Vaccine Antigens From Birth Through 23 Months and Estimated Cumulative Vaccine Antigens From Birth Through Index Date (Primary and Secondary Analyses)

**eTable 8.** Association Between Estimated Vaccine Antigen Exposure and Non-Vaccine-Targeted Infections, With Exposures as Estimated Maximum Single-Day Vaccine Antigens From Birth Through 23 Months and Estimated Maximum Single-Day Vaccine Antigens From Birth Through Index Date (Primary and Secondary Analyses)

**eTable 9.** Association Between Estimated Vaccine Antigen Exposure and Non-Vaccine-Targeted Infections, With Exposures as Estimated Cumulative Vaccine Antigens and Estimated Maximum Single Day Vaccine Antigens From Birth Through 23 Months, (a) Stratified by Chronic Condition Status, (b) Stratified by Outcome Setting, (c) Excluding Children Who Did Not Receive Varicella Vaccination, and (d) Excluding Children Who Received No Vaccines From Birth Through 23 Months (Secondary Analyses)

**eTable 10.** Race/Ethnicity of Study-Eligible Cohort Members and of Cases and Controls From Secondary Analysis Matching on Race/Ethnicity

### eReferences

This supplementary material has been provided by the authors to give readers additional information about their work.

**eTable 1.** ICD-9 and ICD-10 Codes for Infections Not Targeted by Early Childhood Vaccines<sup>a,b</sup>

| <b>Description</b>         | <b>ICD-9</b>                                                                                                                                                                                                                                                                                                                                                                                                                                                                                                                                                                                                                                                                                                                                                                                                                                                                                                                                                                                                                                                                                                                                                                                                                                                                                                                      | <b>ICD-10</b>                                                                                                                                         |
|----------------------------|-----------------------------------------------------------------------------------------------------------------------------------------------------------------------------------------------------------------------------------------------------------------------------------------------------------------------------------------------------------------------------------------------------------------------------------------------------------------------------------------------------------------------------------------------------------------------------------------------------------------------------------------------------------------------------------------------------------------------------------------------------------------------------------------------------------------------------------------------------------------------------------------------------------------------------------------------------------------------------------------------------------------------------------------------------------------------------------------------------------------------------------------------------------------------------------------------------------------------------------------------------------------------------------------------------------------------------------|-------------------------------------------------------------------------------------------------------------------------------------------------------|
| Acute Lymphadenitis        | 683                                                                                                                                                                                                                                                                                                                                                                                                                                                                                                                                                                                                                                                                                                                                                                                                                                                                                                                                                                                                                                                                                                                                                                                                                                                                                                                               | L04.0-L04.9                                                                                                                                           |
| Cellulitis and abscess     | 380.10, 680.0, 680.1, 680.2, 680.3, 680.4, 680.5, 680.6, 680.7, 680.8, 680.9, 681.00, 681.01, 681.02, 681.10, 681.11, 681.9, 682.0, 682.1, 682.2, 682.3, 682.4, 682.5, 682.6, 682.7, 682.8, 682.9                                                                                                                                                                                                                                                                                                                                                                                                                                                                                                                                                                                                                                                                                                                                                                                                                                                                                                                                                                                                                                                                                                                                 | H60.0-H60.1<br>L02.0-L03.9                                                                                                                            |
| Certain bacterial diseases | 020.0, 020.1, 020.2, 020.3, 020.4, 020.5, 020.8, 020.9, 021.0, 021.1, 021.2, 021.3, 021.8, 021.9, 022.0, 022.1, 022.2, 022.3, 022.8, 022.9, 023.0, 023.1, 023.2, 023.3, 023.8, 023.9, 024, 025, 026.0, 026.1, 026.9, 027.0, 027.1, 027.2, 027.8, 027.9, 030.0, 030.1, 030.2, 030.3, 030.8, 030.9, 031.0, 031.1, 031.2, 031.8, 031.9, 034.1, 036.1, 036.2, 036.3, 036.40, 036.41, 036.42, 036.43, 036.81, 036.82, 036.89, 036.9, 038.8, 039.0, 039.1, 039.3, 039.8, 039.9, 040.0, 040.1, 040.41, 040.42, 040.82, 040.89, 041.00, 041.11, 041.12, 041.5, 041.81, 041.89, 041.9, 078.3, 078.88, 079.88, 079.98, 088.0, 090.0, 090.1, 090.2, 090.3, 090.40, 090.41, 090.42, 090.49, 090.5, 090.6, 090.7, 090.9, 091.0, 091.1, 091.2, 091.3, 091.4, 091.50, 091.51, 091.52, 091.61, 091.62, 091.69, 091.7, 091.81, 091.82, 091.89, 092.0, 092.9, 093.0, 093.1, 093.20, 093.21, 093.22, 093.23, 093.24, 093.81, 093.82, 093.89, 093.9, 094.0, 094.1, 094.2, 094.3, 094.81, 094.82, 094.83, 094.84, 094.85, 094.86, 094.89, 094.9, 095.0, 095.1, 095.2, 095.3, 095.4, 095.5, 095.6, 095.7, 095.8, 095.9, 096, 097.0, 097.1, 097.9, 098.0, 098.11, 098.12, 098.13, 098.14, 098.15, 098.16, 098.19, 098.2, 098.31, 098.32, 098.33, 098.34, 098.35, 098.36, 098.40, 098.41, 098.42, 098.43, 098.49, 098.50, 098.51, 098.52, 098.53, 098.59, | A20.0-A32.0<br>A38.0-A38.9<br>A39.3-A39.9<br>A39.1<br>A42.2-A44.9<br>A48.0<br>A48.2-A49.9<br>A74.8-A74.9<br>A50.0-A53.9<br>A54.0-A54.9<br>A55.0-A56.9 |

| Description                                   | ICD-9                                                                                                                                                                                                                                                                                                                                                                                                                                                                                                                                              | ICD-10                                                                  |
|-----------------------------------------------|----------------------------------------------------------------------------------------------------------------------------------------------------------------------------------------------------------------------------------------------------------------------------------------------------------------------------------------------------------------------------------------------------------------------------------------------------------------------------------------------------------------------------------------------------|-------------------------------------------------------------------------|
|                                               | 098.6, 098.7, 098.81, 098.82, 098.83, 098.84, 098.85, 098.86, 098.89, 099.51, 099.52, 099.53, 099.54, 099.55, 099.59, 100.0, 100.81, 100.89, 100.9, 357.4, 484.5, 595.4, 614.9, 616.11, 713.5, 995.91,                                                                                                                                                                                                                                                                                                                                             |                                                                         |
| Dermatophytosis and other superficial mycoses | 110, 110.1, 110.2, 110.3, 110.4, 110.5, 110.6, 110.8, 110.9, 111.0, 111.1, 111.2, 111.3, 111.8, 111.9                                                                                                                                                                                                                                                                                                                                                                                                                                              | B35.0-B36.9                                                             |
| Gastrointestinal infections                   | 001.0, 001.1, 001.9, 002.0, 002.1, 002.2, 002.3, 002.9, 003.0, 003.20, 003.21, 003.22, 003.23, 003.24, 003.29, 003.8, 003.9, 004.0, 004.1, 004.2, 004.3, 004.8, 004.9, 005.0, 005.1, 005.2, 005.4, 005.81, 005.89, 005.9, 006.0, 006.1, 006.2, 006.3, 006.4, 006.5, 006.6, 006.8, 006.9, 007.0, 007.1, 007.2, 007.3, 007.4, 007.5, 007.8, 007.9, 008.00, 008.01, 008.02, 008.03, 008.04, 008.09, 008.2, 008.41, 008.43, 008.44, 008.45, 008.49, 008.5, 008.61, 008.62, 008.63, 008.64, 008.65, 008.66, 008.67, 008.69, 008.8, 009.0, 039.2, 136.5, | A00.0-A02.0<br>A02.2-A09.9<br>A42.1                                     |
| Hepatitis                                     | 070.0, 070.1, 070.20, 070.21, 070.30, 070.31, 070.32, 070.33, 070.41, 070.49, 070.51, 070.52, 070.53, 070.54, 070.59, 070.6, 070.70, 070.71, 070.9,                                                                                                                                                                                                                                                                                                                                                                                                | B15.0-B19.9                                                             |
| Infections in the ear                         | 381.00, 381.02, 381.03, 381.04, 381.05, 381.06, 381.10, 381.19, 381.20, 381.29, 381.3, 381.4, 382.00, 382.01, 382.02, 382.1, 382.2, 382.3, 382.4, 382.9, 383.00, 383.01, 383.02, 383.1, 383.20, 383.21, 383.22, 383.81, 383.89,                                                                                                                                                                                                                                                                                                                    | H65.0-H67.9<br>H70.0-H70.9                                              |
| Infections of the circulatory system          | 391.0, 391.1, 391.2, 391.8, 391.9, 420.90, 420.91, 420.99, 421.0, 421.9, 422.90, 422.91, 422.92, 422.93, 422.99                                                                                                                                                                                                                                                                                                                                                                                                                                    | I00.0-I01.9<br>I30.0-I30.9<br>I33.0-I33.9<br>I39.8-I40.9                |
| Infections of the eye                         | 076.0, 076.1, 076.9, 077.0, 077.98, 372.01, 372.04, 372.06, 372.20, 372.21, 372.22, 372.39, 373.11, 373.12, 373.13, 373.2, 373.8, 373.9                                                                                                                                                                                                                                                                                                                                                                                                            | A71.0-A74.0<br>H10.2-H10.3<br>H10.5-H10.8<br>H00.0-H01.0<br>H01.8-H01.9 |

| <b>Description</b>                                             | <b>ICD-9</b>                                                                                                                                                                                                                                                                                                         | <b>ICD-10</b>                                                                                                  |
|----------------------------------------------------------------|----------------------------------------------------------------------------------------------------------------------------------------------------------------------------------------------------------------------------------------------------------------------------------------------------------------------|----------------------------------------------------------------------------------------------------------------|
| Infections of the musculoskeletal system and connective tissue | 041.09, 041.10, 041.2, 041.89, 711.00, 711.01, 711.02, 711.03, 711.04, 711.05, 711.06, 711.07, 711.08, 711.09, 730.10, 730.11, 730.12, 730.13, 730.14, 730.15, 730.16, 730.17, 730.18, 730.19                                                                                                                        | M00.0-M01.9<br>M86.3-M86.6                                                                                     |
| Infections of the nervous system                               | 320.9, 323.41, 323.42, 323.51, 323.52, 323.61, 323.62, 323.81, 323.82, 323.9, 324.0, 324.1, 324.9, 344.1                                                                                                                                                                                                             | G04.0-G07.9                                                                                                    |
| Infections of the urinary system                               | 099.40, 597.0, 597.80, 597.81                                                                                                                                                                                                                                                                                        | N34.0-N34.1<br>N34.3                                                                                           |
| Laryngitis                                                     | 032.3, 464.00, 464.01, 464.10, 464.11, 464.20, 464.21, 464.30, 464.31, 464.4, 464.50, 464.51, 476.0                                                                                                                                                                                                                  | A36.2<br>J04.0-J05.9<br>J37.0                                                                                  |
| Meningitis                                                     | 036.0, 047.0, 047.1, 047.8, 047.9, 049.0, 049.1, 052.7, 053.0, 053.19, 054.3, 054.72, 055.0, 055.79, 072.1, 072.2, 320.0, 320.1, 320.2, 320.3, 320.7, 320.82, 320.89, 320.9, 321.1, 321.2, 321.8, 322.0, 322.1, 322.2, 322.9, 997.09                                                                                 | A39.0<br>A87.0-A87.9<br>B01.0-B01.1<br>B02.0-B02.1<br>B00.3-B00.4<br>B05.0-B05.1<br>B26.1-B26.2<br>G00.0-G03.9 |
| Mycoses                                                        | 039.4, 039.9, 112.0, 112.1, 112.2, 112.3, 112.4, 112.81, 112.82, 112.83, 112.84, 112.85, 112.89, 112.9, 114.0, 114.1, 114.2, 114.3, 114.4, 114.5, 114.9, 115.00, 115.05, 115.09, 115.10, 115.90, 116.0, 116.1, 116.2, 117.0, 117.1, 117.2, 117.3, 117.4, 117.5, 117.6, 117.7, 117.8, 117.9, 118, 321.0, 484.6, 518.6 | B37.8-B49.9<br>B37.0-B37.6                                                                                     |
| Nasopharyngitis                                                | 032.1                                                                                                                                                                                                                                                                                                                | A36.1                                                                                                          |
| Osteomyelitis                                                  | 730.00, 730.01, 730.02, 730.03, 730.04, 730.05, 730.06, 730.07, 730.08, 730.09                                                                                                                                                                                                                                       | M86.0-M86.2                                                                                                    |
| Other                                                          | 032.2, 032.81, 032.82, 032.83, 032.84, 032.89, 032.9, 099.8, 099.9, 465.0, 465.8, 465.9                                                                                                                                                                                                                              | A36.8-A36.9<br>A63.8-A64.9<br>J06.0-J06.9                                                                      |
| Other acute lower respiratory infections                       | 033.0, 033.1, 033.8, 039.1, 041.00, 041.5, 041.81, 079.1, 079.2, 079.3, 079.6, 079.89, 466.0, 466.11, 466.19, 484.3, 510.0, 510.9, 511.0, 513.0, 513.1, 519.8, 530.84                                                                                                                                                | A37.0-A37.9<br>A42.0<br>J20.0-J22.9<br>J85.0-J86.9                                                             |
| Other local infections of skin and                             | 032.85, 039.0, 380.10, 380.12,                                                                                                                                                                                                                                                                                       | A36.3                                                                                                          |

| <b>Description</b>                                                                | <b>ICD-9</b>                                                                                                                                                                                                                                                                                                                                                                                                                                                                                                                                                                                                                                                                                                                                                                                                                                                                                                           | <b>ICD-10</b>                                                     |
|-----------------------------------------------------------------------------------|------------------------------------------------------------------------------------------------------------------------------------------------------------------------------------------------------------------------------------------------------------------------------------------------------------------------------------------------------------------------------------------------------------------------------------------------------------------------------------------------------------------------------------------------------------------------------------------------------------------------------------------------------------------------------------------------------------------------------------------------------------------------------------------------------------------------------------------------------------------------------------------------------------------------|-------------------------------------------------------------------|
| subcutaneous tissue                                                               | 380.14, 380.23, 684, 686.00, 686.09, 686.8, 686.9, 690.8                                                                                                                                                                                                                                                                                                                                                                                                                                                                                                                                                                                                                                                                                                                                                                                                                                                               | L08.0-L08.9<br>H60.2-H60.4<br>H60.8-H60.9<br>L00.0-L01.1<br>L30.3 |
| Pharyngitis                                                                       | 034.0, 462                                                                                                                                                                                                                                                                                                                                                                                                                                                                                                                                                                                                                                                                                                                                                                                                                                                                                                             | J02.0-J02.9                                                       |
| Pneumonia                                                                         | 480.0, 480.1, 480.2, 480.3, 480.8, 480.9, 481, 482.0, 482.1, 482.2, 482.31, 482.32, 482.39, 482.40, 482.41, 482.42, 482.49, 482.81, 482.82, 482.83, 482.84, 482.89, 482.9, 483.0, 483.1, 483.8, 484.7, 484.8, 485, 486, 487.0, 514, 517.1                                                                                                                                                                                                                                                                                                                                                                                                                                                                                                                                                                                                                                                                              | J12.0-J18.9<br>A48.1                                              |
| Protozoal diseases, helminthiases, pediculosis, acariasis, and other infestations | 084.0, 084.1, 084.2, 084.3, 084.4, 084.5, 084.6, 084.8, 084.9, 085.0, 085.1, 085.2, 085.3, 085.4, 085.5, 085.9, 086.0, 086.1, 086.2, 086.3, 086.4, 086.5, 086.9, 088.82, 088.9, 120.0, 120.1, 120.2, 120.3, 120.8, 120.9, 121.0, 121.1, 121.2, 121.3, 121.4, 121.5, 121.6, 121.8, 121.9, 122.0, 122.1, 122.2, 122.3, 122.4, 122.5, 122.6, 122.7, 122.8, 122.9, 123.0, 123.1, 123.2, 123.3, 123.4, 123.5, 123.6, 123.8, 123.9, 124, 125.0, 125.1, 125.2, 125.3, 125.5, 125.6, 125.7, 125.9, 126.0, 126.1, 126.2, 126.3, 126.8, 126.9, 127.0, 127.1, 127.2, 127.3, 127.4, 127.5, 127.6, 127.7, 127.8, 127.9, 128.0, 128.1, 128.8, 128.9, 129, 130.0, 130.1, 130.2, 130.3, 130.4, 130.5, 130.7, 130.9, 131.00, 131.01, 131.02, 131.03, 131.09, 131.8, 131.9, 132.0, 132.1, 132.2, 132.3, 132.9, 133.0, 133.8, 134.0, 134.1, 134.2, 134.8, 134.9, 136.21, 136.29, 136.3, 136.8, 136.9, 370.8, 372.15, 484.8, 581.81, 686.8 | B50.0-B89.9<br>A59.0-A59.9                                        |
| Rickettsiosis                                                                     | 080, 081.0, 081.1, 081.2, 081.9, 082.0, 082.1, 082.2, 082.3, 082.40, 082.41, 082.49, 082.8, 083.0, 083.1, 083.2, 083.8, 083.9                                                                                                                                                                                                                                                                                                                                                                                                                                                                                                                                                                                                                                                                                                                                                                                          | A75.0-A79.9                                                       |
| Sepsis                                                                            | 003.1, 027.0, 036.2, 038.0, 038.10, 038.11, 038.12, 038.19,                                                                                                                                                                                                                                                                                                                                                                                                                                                                                                                                                                                                                                                                                                                                                                                                                                                            | A02.1                                                             |

| <b>Description</b>     | <b>ICD-9</b>                                                                                                                                                                                                                                                                                                                                                                                                                                                                                                                                                          | <b>ICD-10</b>                                                                                                                                                                             |
|------------------------|-----------------------------------------------------------------------------------------------------------------------------------------------------------------------------------------------------------------------------------------------------------------------------------------------------------------------------------------------------------------------------------------------------------------------------------------------------------------------------------------------------------------------------------------------------------------------|-------------------------------------------------------------------------------------------------------------------------------------------------------------------------------------------|
|                        | 038.2, 038.3, 038.40, 038.41, 038.42, 038.43, 038.44, 038.49, 038.8, 038.9, 112.5, 995.91                                                                                                                                                                                                                                                                                                                                                                                                                                                                             | A32.7<br>A39.2<br>A40.0-A41.9<br>B37.7                                                                                                                                                    |
| Sinusitis              | 461.0, 461.3, 461.8, 473.0, 473.1, 473.2, 473.3, 473.8, 473.9                                                                                                                                                                                                                                                                                                                                                                                                                                                                                                         | J01.0-J01.1<br>J01.3-J01.9<br>J32.0-J32.9                                                                                                                                                 |
| Spirochetal disease    | 087.0, 087.1, 087.9, 088.81, 101, 102.0, 102.1, 102.2, 102.3, 102.4, 102.5, 102.6, 102.7, 102.8, 102.9, 103.0, 103.1, 103.2, 103.3, 103.9, 104.8, 104.9, 528.1                                                                                                                                                                                                                                                                                                                                                                                                        | A65.0-A69.9                                                                                                                                                                               |
| Tonsillitis            | 032.0, 034.0, 463                                                                                                                                                                                                                                                                                                                                                                                                                                                                                                                                                     | A36.0<br>J03.0-J03.9                                                                                                                                                                      |
| Tuberculosis           | 010.90, 011.30, 011.90, 012.00, 012.10, 012.20, 012.30, 012.80, 013.00, 013.10, 013.20, 013.30, 013.40, 013.50, 013.60, 013.62, 013.80, 014.00, 014.80, 015.00, 015.10, 015.20, 015.60, 015.70, 015.80, 015.90, 016.00, 016.10, 016.20, 016.30, 016.50, 016.60, 016.70, 016.90, 017.00, 017.10, 017.20, 017.30, 017.40, 017.50, 017.60, 017.70, 017.80, 017.90, 018.00, 018.80, 018.90, 363.13, 364.11, 370.31, 370.59, 379.09, 420.0, 422.0, 424.91, 425.8, 601.4, 711.45, 711.46, 711.48, 720.81, 730.88, 737.40                                                    | A15.0-A19.9                                                                                                                                                                               |
| Unspecified infections | 136.8, 136.9                                                                                                                                                                                                                                                                                                                                                                                                                                                                                                                                                          | B99.0-B99.9                                                                                                                                                                               |
| Viral infections       | 045.10, 045.20, 045.90, 046.0, 046.11, 046.19, 046.2, 046.3, 046.71, 046.72, 046.79, 046.8, 046.9, 048, 049.8, 049.9, 050.0, 050.1, 050.9, 051.01, 051.02, 051.1, 051.2, 051.9, 052.1, 052.7, 052.8, 052.9, 053.10, 053.11, 053.12, 053.13, 053.14, 053.19, 053.20, 053.21, 053.22, 053.29, 053.71, 053.79, 053.8, 053.9, 054.0, 054.10, 054.11, 054.12, 054.13, 054.19, 054.2, 054.40, 054.41, 054.42, 054.43, 054.44, 054.49, 054.5, 054.6, 054.71, 054.73, 054.74, 054.79, 054.8, 054.9, 055.1, 055.2, 055.71, 055.79, 055.9, 056.71, 056.79, 056.9, 057.0, 057.8, | A80.0-A86.9<br>A88.0-A99.9<br>B02.2-B04.9<br>B08.0-B09.9<br>B01.2-B01.9<br>B00.0-B00.2<br>A60.0-A60.9<br>B00.5-B00.9<br>B05.2-B05.9<br>B06.1-B06.9<br>B20.0-B26.0<br>B26.3-B34.9<br>A63.0 |

| Description | ICD-9                                                                                                                                                                                                                                                                                                                                                                                                                                                                                                                                                                                                                                                                                                                                | ICD-10      |
|-------------|--------------------------------------------------------------------------------------------------------------------------------------------------------------------------------------------------------------------------------------------------------------------------------------------------------------------------------------------------------------------------------------------------------------------------------------------------------------------------------------------------------------------------------------------------------------------------------------------------------------------------------------------------------------------------------------------------------------------------------------|-------------|
|             | 057.9, 058.10, 058.11, 058.12,<br>059.00, 059.01, 059.09, 059.10,<br>059.11, 059.12, 059.19, 059.20,<br>059.21, 059.22, 059.8, 060.0,<br>060.1, 060.9, 061, 062.0, 062.1,<br>062.2, 062.3, 062.4, 062.5,<br>062.8, 062.9, 063.0, 063.1,<br>063.2, 063.8, 063.9, 064, 065.0,<br>065.1, 065.2, 065.3, 065.4,<br>065.9, 066.0, 066.1, 066.2,<br>066.3, 066.40, 066.41, 066.42,<br>066.49, 066.8, 066.9, 071,<br>072.0, 072.3, 072.71, 072.72,<br>072.79, 072.9, 074.0, 074.1,<br>074.20, 074.21, 074.22, 074.23,<br>074.3, 074.8, 075, 077.1, 077.2,<br>077.3, 077.4, 077.8, 077.99,<br>078.0, 078.11, 078.2, 078.4,<br>078.5, 078.6, 078.7, 078.81,<br>078.89, 079.0, 079.59, 079.81,<br>079.83, 079.89, 484.1, 573.1,<br>577.0, 790.8 |             |
| Viral warts | 078.10, 078.12, 078.19                                                                                                                                                                                                                                                                                                                                                                                                                                                                                                                                                                                                                                                                                                               | B07.0-B07.9 |

Abbreviations: ICD-9, International Classification of Diseases, 9<sup>th</sup> edition; ICD-10, International Classification of Diseases, 10<sup>th</sup> edition

<sup>a</sup>ICD-10 codes were obtained from Sørup et al. (Online-only Supplement reference 1), and a crosswalk tool maintained by Kaiser Permanente was used to convert these codes to their ICD-9 code equivalents.

<sup>b</sup>This list included some ICD codes for vaccine preventable diseases (VPDs) to be inclusive. VPDs were excluded among potential cases upon medical record review and potential controls were excluded if they had an ICD code for a VPD.

**eTable 2. ICD-9 and ICD-10 Codes for Excluded Infections Targeted by Early Childhood Vaccines<sup>a</sup>**

| Description                          | ICD-9                                                                                                                                              | ICD-10                                                                                   |
|--------------------------------------|----------------------------------------------------------------------------------------------------------------------------------------------------|------------------------------------------------------------------------------------------|
| Hepatitis                            | 070.0, 070.1, 070.20, 070.21, 070.30, 070.31, 070.32, 070.33, 070.41, 070.49, 070.51, 070.52, 070.53, 070.54, 070.59, 070.6, 070.70, 070.71, 070.9 | B15.0-B19.9                                                                              |
| Influenza                            | 487.x, 488.x                                                                                                                                       | J11.x, J10.08, J10.1, J09.x9                                                             |
| <i>Haemophilus influenzae</i> type b | 041.5                                                                                                                                              | B96.3                                                                                    |
| Measles                              | 055.x                                                                                                                                              | B05.x                                                                                    |
| Mumps                                | 072.x                                                                                                                                              | B26.x                                                                                    |
| Varicella                            | 052.x                                                                                                                                              | B01.x                                                                                    |
| Pertussis                            | 033.0, 033.1, 033.8, 033.9                                                                                                                         | A37.00, A37.1, A37.8, A37.9                                                              |
| Pneumococcal disease                 | 481, 482.9, 485, 486, 320.1, 320.9, 790.7, 038.2, 038.9, 567.1, 383, 283.11, 041.2                                                                 | J18.1, J15.9, J18, J18.9, G00.1, G00.9, G04.2, R78.81, A40.3, A41.9, H70.X, D59.3, B95.3 |
| Rotavirus                            | 008.61                                                                                                                                             | A08.0                                                                                    |
| Diphtheria                           | 032.x                                                                                                                                              | A36.x                                                                                    |
| Tetanus                              | 037.x                                                                                                                                              | A35.x                                                                                    |

Abbreviations: ICD-9, International Classification of Diseases, 9<sup>th</sup> edition; ICD-10, International Classification of Diseases, 10<sup>th</sup> edition

<sup>a</sup>ICD codes were not included for rubella and poliomyelitis since rubella was eliminated from the United States in 2004 (Online-only Supplement reference 2) and Americas were certified polio-free in 1994 (Online-only Supplement reference 3). For cases, medical record notes were reviewed for documentation of diseases targeted by early childhood vaccines on the same date. For controls, electronic data were used to identify inpatient or emergency department diagnoses for diseases targeted by early childhood vaccines.



**eTable 3.** Number of Antibody-Stimulating Protein and Polysaccharide Antigens<sup>a</sup> in Early Childhood Vaccines Universally Recommended by the US Advisory Committee on Immunization Practices<sup>b</sup>

| Type of vaccine                                 | Number of Antigens Per Dose                    |
|-------------------------------------------------|------------------------------------------------|
| Hepatitis B (HepB)                              | 1                                              |
| Diphtheria-Tetanus-acellular Pertussis (DTaP)   | 4, 5, or 6, depending on brand                 |
| <i>Haemophilus influenzae</i> type b (Hib)      | 2                                              |
| Pneumococcal                                    | 8 (against 7 types of pneumococcal bacteria)   |
|                                                 | 14 (against 13 types of pneumococcal bacteria) |
| Polio                                           | 15                                             |
| Rotavirus                                       | 16                                             |
| Measles-mumps-rubella (MMR)                     | 24                                             |
| Varicella                                       | 69                                             |
| Seasonal influenza                              | 12 (trivalent)                                 |
|                                                 | 14 (quadrivalent)                              |
| 2009 H1N1 (Influenza A 2009 Monovalent Vaccine) | 8                                              |
| Hepatitis A                                     | 4                                              |
| <i>Combination Vaccines</i>                     |                                                |
| DTaP-HepB-Polio                                 | 21                                             |
| DTaP-Hib-Polio                                  | 23                                             |
| Hib-HepB                                        | 3                                              |
| DTaP-Hib                                        | 6                                              |
| MMR-Varicella                                   | 93                                             |

<sup>a</sup> The minimum estimated cumulative number of vaccine antigens a child could have received between birth and age 23 months is 0 antigens (if the child was completely unvaccinated). The number of estimated cumulative vaccine antigens in a child who is being vaccinated per the U.S. recommended immunization schedule varied throughout the time period of this study, which includes children born 2003-2012. For example, a child born in 2003 could have received 3 hepatitis B vaccines (3 x 1 antigens), 4 diphtheria-tetanus-pertussis vaccines (4 x 4 antigens), 3 *Haemophilus influenzae type b* vaccines (4 x 2 antigens), 3 pneumococcal conjugate vaccines against 7 types of pneumococcal bacteria (4 x 7 antigens), 3 polio vaccines (3 x 15 antigens), 1 measles-mumps-rubella vaccine (24 antigens) and 1 varicella vaccine (69 antigens)=193 antigens and be considered fully-vaccinated. In our study, the maximum number of cumulative vaccines antigens a child could have received between birth and age 23 months is 435: 4 hepatitis B vaccines (4 x 1 antigens), 4 diphtheria-tetanus-pertussis vaccines (4 x 6 antigens), 4 *Haemophilus influenzae type b* vaccines (4 x 2 antigens), 4 pneumococcal conjugate vaccines against 13 types of pneumococcal bacteria (4 x 14 antigens), 3 polio vaccines (3 x 15 antigens), 3 rotavirus vaccines (3 x 16 antigens), 2 Hepatitis A vaccines (2 x 4 antigens), 4 quadrivalent seasonal influenza vaccines (4 x 14 antigens), 2 measles-mumps-rubella vaccines (2 x 24 antigens), and 2 varicella vaccines (2 x 69 antigens). Per the Advisory Committee on Immunization Practices schedule, one dose of the measles-mumps-rubella and one dose of the varicella vaccine are recommended at age 12 months, and the second doses for each vaccine is recommended at ages 4 to 6 years. However, children can receive these second doses earlier, provided at least 4 weeks has elapsed since the first measles-mumps-rubella vaccine dose and 3 months has elapsed since the first varicella vaccine dose (Online-only Supplement reference 4).

<sup>b</sup> References for antigen amounts are Online-only Supplement references 5 and 6.

**eTable 4.** Common Combinations of Estimated Cumulative Vaccine Antigen Exposure From Birth Through 23 Months, by Decile of Exposure

| Decile and Range of Estimated Cumulative Antigen Exposure (Number of children in decile) | Examples of common combinations of estimated cumulative vaccine exposure (Number of children with that combination) <sup>a</sup>                                                                                                                                                                                                                                                                                                                                                                                                                                                                                                                                                                                                                                  |
|------------------------------------------------------------------------------------------|-------------------------------------------------------------------------------------------------------------------------------------------------------------------------------------------------------------------------------------------------------------------------------------------------------------------------------------------------------------------------------------------------------------------------------------------------------------------------------------------------------------------------------------------------------------------------------------------------------------------------------------------------------------------------------------------------------------------------------------------------------------------|
| Decile 1:<br>0 – 198 antigens<br>(n= 91)                                                 | <p><u>Example 1 (n=11):</u><br/>3 hepatitis B vaccines (3 x 1 antigen), 4 DTaP vaccines (4 x 5 antigens), 3 PCV7 vaccines (3 x 8 antigens), 4 Hib vaccines (4 x 2 antigens), 3 polio vaccines (3 x 15 antigens), 1 MMR vaccine (24 antigens), and 1 varicella vaccine (69 antigens) = 193 cumulative vaccine antigens</p> <p><u>Example 2 (n=8):</u><br/>3 hepatitis B vaccines (3 x 1 antigen), 4 DTaP vaccines (4 x 5 antigens), 3 PCV7 vaccines (3 x 8 antigens), 3 Hib vaccines (3 x 2 antigens), 3 polio vaccines (3 x 15 antigens), 1 MMR vaccine (24 antigens), and 1 varicella vaccine (69 antigens) = 191 cumulative vaccine antigens</p>                                                                                                                |
| Decile 2:<br>199 – 205 antigens<br>(n= 97)                                               | <p><u>Example 3 (n=20):</u><br/>3 hepatitis B vaccines (3 x 1 antigens), 4 DTaP vaccines (4 x 5 antigens), 4 PCV7 vaccines (4 x 8 antigens), 3 Hib vaccines (3 x 2 antigens), 3 polio vaccines (3 x 15 antigens), 1 MMR vaccine (24 antigens), 1 varicella vaccine (69 antigens) = 199 cumulative vaccine antigens</p> <p><u>Example 4 (n=17):</u><br/>3 hepatitis B vaccines (3 x 1 antigens), 4 DTaP vaccines (4 x 5 antigens), 4 PCV7 vaccines (4 x 8 antigens), 4 Hib vaccines (4 x 2 antigens), 3 polio vaccines (3 x 15 antigens), 1 MMR vaccine (24 antigens), 1 varicella vaccine (69 antigens), and 1 hepatitis A vaccine (4 antigens) = 205 cumulative vaccine antigens</p>                                                                             |
| Decile 3:<br>206-215 antigens (n= 100)                                                   | <p><u>Example 5 (n=22):</u><br/>3 hepatitis B vaccines (3 x 1 antigens), 4 DTaP vaccines (4 x 5 antigens), 4 PCV7 vaccines (4 x 8 antigens), 3 Hib vaccines (3 x 2 antigens), 3 polio vaccines (3 x 15 antigens), 1 MMR vaccine (24 antigens), 1 varicella vaccine (69 antigens), and 1 trivalent seasonal influenza vaccine (12 antigens) = 211 cumulative vaccine antigens</p> <p><u>Example 6 (n= 13)</u><br/>4 hepatitis B vaccines (4 x 1 antigens), 4 DTaP vaccines (4 x 5 antigens), 4 PCV7 vaccines (4 x 8 antigens), 3 Hib vaccines (3 x 2 antigens), 3 polio vaccines (3 x 15 antigens), 1 MMR vaccine (24 antigens), 1 varicella vaccine (69 antigens), and 1 trivalent seasonal influenza vaccine (12 antigens) = 212 cumulative vaccine antigens</p> |

eTable 4, cont.

| Decile and Range of Estimated Cumulative Antigen Exposure (Number of children in decile) | Examples of common combinations of cumulative vaccine exposure (Number of children with that combination)                                                                                                                                                                                                                                                                                                                                                                                                                                                                                                                                                                                                                                                                                                      |
|------------------------------------------------------------------------------------------|----------------------------------------------------------------------------------------------------------------------------------------------------------------------------------------------------------------------------------------------------------------------------------------------------------------------------------------------------------------------------------------------------------------------------------------------------------------------------------------------------------------------------------------------------------------------------------------------------------------------------------------------------------------------------------------------------------------------------------------------------------------------------------------------------------------|
| <p>Decile 4:<br/>216 – 224 antigens<br/>(n= 79 children)</p>                             | <p><u>Example 7 (n=24):</u><br/>3 hepatitis B vaccines (3 x 1 antigens), 4 DTaP vaccines (4 x 5 antigens), 4 PCV7 vaccines (4 x 8 antigens), 3 Hib vaccines (3 x 2 antigens), 3 polio vaccines (3 x 15 antigens), 1 MMR vaccine (24 antigens), 1 varicella vaccine (69 antigens), and 2 trivalent seasonal influenza vaccines (2 x 12 antigens) = 223 cumulative vaccine antigens</p> <p><u>Example 8 (n=16):</u><br/>4 hepatitis B vaccines (4 x 1 antigens), 4 DTaP vaccines (4 x 5 antigens), 4 PCV7 vaccines (4 x 8 antigens), 3 Hib vaccines (3 x 2 antigens), 3 polio vaccines (3 x 15 antigens), 1 MMR vaccine (24 antigens), 1 varicella vaccine (69 antigens), 1 hepatitis A vaccine (4 antigens), and 1 trivalent seasonal influenza vaccines (12 antigens) = 216 cumulative vaccine antigens</p>    |
| <p>Decile 5:<br/>225 – 235 antigens<br/>(n= 105)</p>                                     | <p><u>Example 9 (n=19):</u><br/>3 hepatitis B vaccines (3 x 1 antigens), 4 DTaP vaccines (4 x 5 antigens), 4 PCV7 vaccines (4 x 8 antigens), 4 Hib vaccines (4 x 2 antigens), 3 polio vaccines (3 x 15 antigens), 1 MMR vaccine (24 antigens), 1 varicella vaccine (69 antigens), and 2 trivalent seasonal influenza vaccines (2 x 12 antigens) = 225 cumulative vaccine antigens</p> <p><u>Example 10 (n=15):</u><br/>3 hepatitis B vaccines (3 x 1 antigens), 4 DTaP vaccines (4 x 5 antigens), 4 PCV7 vaccines (4 x 8 antigens), 4 Hib vaccines (4 x 2 antigens), 3 polio vaccines (3 x 15 antigens), 1 MMR vaccine (24 antigens), 1 varicella vaccine (69 antigens), 1 hepatitis A vaccine, and 2 trivalent seasonal influenza vaccines (2 x 12 antigens) = 229 cumulative vaccine antigens</p>            |
| <p>Decile 6:<br/>236 – 253 antigens<br/>(n= 93)</p>                                      | <p><u>Example 11 (n=14):</u><br/>4 hepatitis B vaccines (4 x 1 antigens), 4 DTaP vaccines (4 x 5 antigens), 4 PCV7 vaccines (4 x 8 antigens), 3 Hib vaccines (3 x 2 antigens), 3 polio vaccines (3 x 15 antigens), 1 MMR vaccine (24 antigens), 1 varicella vaccine (69 antigens), and 3 trivalent seasonal influenza vaccine (3 x 12 antigens) = 236 cumulative vaccine antigens</p> <p><u>Example 12 (n=11):</u><br/>3 hepatitis B vaccines (3 x 1 antigens), 4 DTaP vaccines (4 x 5 antigens), 4 PCV7 vaccines (4 x 8 antigens), 4 Hib vaccines (4 x 2 antigens), 3 polio vaccines (3 x 15 antigens), 1 MMR vaccine (24 antigens), 1 varicella vaccine (69 antigens), 1 hepatitis A vaccine (4 antigens) and 3 trivalent seasonal influenza vaccine (3 x 12 antigens) = 241 cumulative vaccine antigens</p> |

eTable 4, cont.

| Decile and Range of Estimated Cumulative Antigen Exposure (Number of children in decile) | Examples of common combinations of cumulative vaccine exposure (Number of children with that combination)                                                                                                                                                                                                                                                                                                                                                                                                                                                                                                                                                                                                                                                                                                                                                                                                                                                                                             |
|------------------------------------------------------------------------------------------|-------------------------------------------------------------------------------------------------------------------------------------------------------------------------------------------------------------------------------------------------------------------------------------------------------------------------------------------------------------------------------------------------------------------------------------------------------------------------------------------------------------------------------------------------------------------------------------------------------------------------------------------------------------------------------------------------------------------------------------------------------------------------------------------------------------------------------------------------------------------------------------------------------------------------------------------------------------------------------------------------------|
| Decile 7:<br>254 – 276 antigens<br>(n= 102)                                              | <p><u>Example 13 (n=9):</u><br/>3 hepatitis B vaccines (3 x 1 antigen), 3 DTaP vaccines with 6 antigens (3 x 6 antigens), 1 DTaP vaccines with 5 antigens, 4 PCV7 vaccines (4 x 8 antigens), 4 Hib vaccines (4 x 2 antigens), 3 polio vaccines (3 x 15 antigens), 2 rotavirus vaccines (2 x 16 antigens), 1 MMR vaccine (24 antigens), 1 varicella vaccine (69 antigens), 2 hepatitis A vaccines (2 x 4 antigens), and 2 trivalent seasonal influenza vaccines (2 x 12 antigens) = 268 cumulative vaccine antigens</p> <p><u>Example 14 (n=7):</u><br/>4 hepatitis B vaccines (4 x 1 antigens), 4 DTaP vaccines (4 x 5 antigens), 4 PCV7 vaccines (4 x 8 antigens), 3 Hib vaccines (3 x 2 antigens), 3 polio vaccines (3 x 15 antigens), 3 rotavirus vaccines (3 x 16 antigens), 1 MMR vaccine (24 antigens), 1 varicella vaccine (69 antigens), 1 hepatitis A vaccine (4 antigens), and 2 trivalent seasonal influenza vaccines (2 x 12 antigens) = 276 cumulative vaccine antigens</p>              |
| Decile 8:<br>277 – 292 antigens<br>(n= 83)                                               | <p><u>Example 15 (n=5)</u><br/>4 hepatitis B vaccines (4 x 1 antigen), 4 DTaP vaccines (4 x 5 antigens), 4 PCV7 vaccines (4 x 8 antigens), 4 Hib vaccines (4 x 2 antigens), 3 polio vaccines (3 x 15 antigens), 3 rotavirus vaccines (3 x 16 antigens), 1 MMR vaccine (24 antigens), 1 varicella vaccine (69 antigens), 2 hepatitis A vaccines (2 x 4 antigens), and 2 trivalent seasonal influenza vaccines (2 x 12 antigens)= 282 cumulative vaccine antigens</p> <p><u>Example 16 (n=4)</u><br/>4 hepatitis B vaccines (4 x 1 antigen), 4 DTaP vaccines (4 x 5 antigens), 4 PCV13 vaccines (4 x 14 antigens), 4 Hib vaccines (4 x 2 antigens), 3 polio vaccines (3 x 15 antigens), 3 rotavirus vaccines (3 x 16 antigens), 1 MMR vaccine (24 antigens), 1 varicella vaccine (69 antigens), and 1 hepatitis A vaccine (4 antigens) = 278 cumulative vaccine antigens</p>                                                                                                                            |
| Decile 9:<br>293 – 305 antigens<br>(n= 94)                                               | <p><u>Example 17 (n=9)</u><br/>3 hepatitis B vaccines (3 x 1 antigen), 3 DTaP vaccines with 6 antigens (3 x 6 antigens), 1 DTaP vaccines with 5 antigens, 4 PCV13 vaccines (4 x 14 antigens), 4 Hib vaccines (4 x 2 antigens), 3 polio vaccines (3 x 15 antigens), 2 rotavirus vaccines (2 x 16 antigens), 1 MMR vaccine (24 antigens), 1 varicella vaccine (69 antigens), 2 hepatitis A vaccines (2 x 4 antigens), and 3 trivalent seasonal influenza vaccines (3 x 12 antigens) = 304 cumulative vaccine antigens</p> <p><u>Example 18 (n=6)</u><br/>3 hepatitis B vaccines (3 x 1 antigen), 4 DTaP vaccines with 6 antigens (4 x 6 antigens), 4 PCV13 vaccines (4 x 14 antigens), 4 Hib vaccines (4 x 2 antigens), 3 polio vaccines (3 x 15 antigens), 3 rotavirus vaccines (3 x 16 antigens), 1 MMR vaccine (24 antigens), 1 varicella vaccine (69 antigens), 1 hepatitis A vaccines (1 x 4 antigens), and 2 trivalent seasonal influenza vaccines (2 x 12) = 305 cumulative vaccine antigens</p> |

eTable 4, cont.

| Decile and Range of Estimated Cumulative Antigen Exposure (Number of children in decile) | Examples of common combinations of cumulative vaccine exposure (Number of children with that combination)                                                                                                                                                                                                                                                                                                                                                                                                                                                                                                                                                                                                                                                                                                                                                                                                                                                                                                                                                                |
|------------------------------------------------------------------------------------------|--------------------------------------------------------------------------------------------------------------------------------------------------------------------------------------------------------------------------------------------------------------------------------------------------------------------------------------------------------------------------------------------------------------------------------------------------------------------------------------------------------------------------------------------------------------------------------------------------------------------------------------------------------------------------------------------------------------------------------------------------------------------------------------------------------------------------------------------------------------------------------------------------------------------------------------------------------------------------------------------------------------------------------------------------------------------------|
| Decile 10:<br>306 – 399 antigens<br>(n= 100)                                             | <p><u>Example 19 (n=12)</u><br/>3 hepatitis B vaccines (3 x 1 antigen), 4 DTaP vaccines with 6 antigens (4 x 6 antigens), 4 PCV13 vaccines (4 x 14 antigens), 4 Hib vaccines (4 x 2 antigens), 3 polio vaccines (3 x 15 antigens), 3 rotavirus vaccines (3 x 16 antigens), 1 MMR vaccine (24 antigens), 1 varicella vaccine (69 antigens), 1 hepatitis A vaccines (1 x 4 antigens), and 3 trivalent seasonal influenza vaccines (3 x 12) = 317 cumulative vaccine antigens</p> <p><u>Example 20 (n=10)</u><br/>3 hepatitis B vaccines (3 x 1 antigen), 3 DTaP vaccines with 6 antigens (3 x 6 antigens), 1 DTaP vaccine with 5 antigens (1 x 5 antigens), 4 PCV13 vaccines (4 x 14 antigens), 4 Hib vaccines (4 x 2 antigens), 3 polio vaccines (3 x 15 antigens), 2 rotavirus vaccines (2 x 16 antigens), 1 MMR vaccine (24 antigens), 1 varicella vaccine (69 antigens), 2 hepatitis A vaccines (2 x 4 antigens), 1 trivalent seasonal influenza vaccines (1 x 12 antigens), 2 quadrivalent influenza vaccines (2 x 14 antigens) = 308 cumulative vaccine antigens</p> |

Abbreviations: DTaP, diphtheria-tetanus-acellular pertussis vaccine; PCV7, pneumococcal conjugate vaccine against 7 types of pneumococcal bacteria; PCV13, pneumococcal conjugate vaccine against 13 types of pneumococcal bacteria; Hib; *Haemophilus influenzae type b* vaccine; MMR; measles-mumps-rubella vaccine

<sup>a</sup> Doses of Hepatitis B, DTaP, Hib, polio, MMR and varicella vaccines may have been given individually or as part of a combination vaccine.

**eTable 5.** Estimated Cumulative Vaccine Antigen Amounts From Birth Through 23 Months, by Birth Year Period

| <b><u>Birthyear period:</u></b>       | <b>OVERALL:<br/>All birthyears<br/>combined</b>             | <b>EARLY<sup>a</sup><br/>2003-2005</b>                      | <b>MIDDLE<sup>a</sup><br/>2006-2008</b>  | <b>LATE<sup>a</sup><br/>2009-2013</b>    |
|---------------------------------------|-------------------------------------------------------------|-------------------------------------------------------------|------------------------------------------|------------------------------------------|
|                                       | N<br><i>Mean estimated<br/>cumulative<br/>antigens (sd)</i> | n (row %)<br><i>Mean estimated cumulative antigens (sd)</i> |                                          |                                          |
| In study-eligible cohort              | N=495,193<br><br>254.6 (53.6)                               | n=128,602<br>(26.0%)<br><br>209.9 (31.0)                    | n=139,374<br>(28.2%)<br><br>250.8 (47.5) | n=227,217<br>(45.9%)<br><br>282.2 (49.3) |
| Among electronically-identified cases | N=47,061<br><br>256.6 (50.8)                                | n=11,463<br>(24.4%)<br><br>211.6 (28.1)                     | n=14,600<br>(31.0%)<br><br>252.5 (45.2)  | n=20,998<br>(44.6%)<br><br>283.9 (45.6)  |
| Among cases sampled for review        | N=385<br><br>243.7 (50.2)                                   | n=147 (38.2%)<br><br>212.6 (25.2)                           | n=118<br>(30.7%)<br><br>245.4 (46.2)     | n=120<br>(31.2%)<br><br>279.7 (52.7)     |
| Among confirmed cases                 | N=193<br><br>240.6 (48.3)                                   | n=90<br>(46.6%)<br><br>216.4 (15.5)                         | n=48<br>(24.9%)<br><br>242.3 (50.9)      | n=55<br>(28.5%)<br><br>278.7 (56.5)      |

Abbreviations: sd=standard deviation

<sup>a</sup>We divided the study follow-up time into early, middle and late periods based on the additions of newer vaccines to the recommended U.S. Advisory Committee on Immunization Practices vaccination schedule. Early period included the expansion of the influenza vaccine recommendations (2004); middle period included the reintroduction of the rotavirus vaccine (2006) and expansion of the Hepatitis A recommendations (2006); late period included the addition of the H1N1 vaccine (2009) and pneumococcal conjugate vaccine (PCV13, 2010) (Online-only supplement references 7-11).

**eTable 6. Quantitative Bias Analysis for Potential Exposure Misclassification**

*eTable 6a: Potential misclassification of estimated cumulative vaccine antigen exposure from birth through 23 months*

|                                          |                                          | True cumulative vaccine antigen exposure |                                   |
|------------------------------------------|------------------------------------------|------------------------------------------|-----------------------------------|
|                                          |                                          | 199 – 399 antigens                       | 0 – 198 antigens                  |
| Observed in Vaccine Safety Datalink data | Top 90% of exposure: 199 – 399 antigens  | True Positives (TP)                      | False Positives (FP) <sup>b</sup> |
|                                          | Bottom 10% of exposure: 0 - 198 antigens | False Negatives (FN) <sup>a</sup>        | True Negatives (TN)               |

<sup>a</sup>Due to children possibly receiving vaccines outside of the Vaccine Safety Datalink site, we may have exposure false negatives which would lead to imperfect exposure sensitivity: TP/(TP+FN).

<sup>b</sup>We assume that there are no exposure false positives. That is, if a child has immunization records indicating receipt of most or all recommended vaccines, those records are likely correct. Therefore, we assume perfect exposure specificity.

*eTable 6b: Quantitative bias analysis<sup>a</sup> for potential exposure misclassification in estimating the association between estimated cumulative vaccine antigen exposure from birth through 23 months<sup>b</sup> and non-vaccine-targeted infections in inpatient and emergency department settings in ages 24 through 47 months*

| Non-differential exposure sensitivity | Corrected odds ratio (95% confidence interval)                                                                                                                                     |
|---------------------------------------|------------------------------------------------------------------------------------------------------------------------------------------------------------------------------------|
| 100% - No exposure misclassification  | 1.13 (95% CI: 0.65 – 1.97)                                                                                                                                                         |
| 99.0%                                 | 1.15 (95% CI: 0.62 – 2.12)                                                                                                                                                         |
| 97.5%                                 | 1.18 (95% CI: 0.56 – 2.49)                                                                                                                                                         |
| 95.0%                                 | 1.29 (95% CI: 0.39 – 4.23)                                                                                                                                                         |
| 92.5%                                 | 1.82 (95% CI: 0.07 – 46.30)                                                                                                                                                        |
| 90.0%                                 | N/A: Exposure sensitivity levels $\leq$ 90% are not plausible in our data since these levels would lead to no individuals observed in the 0-198 range of vaccine antigen exposure. |

<sup>a</sup>Using quantitative bias analysis methodology described by Lash, Fox and Fink (Online-only Supplement reference 12)

<sup>b</sup>In these analyses, the exposed group is children in the top 90% of exposure to estimated cumulative vaccine antigen exposure from birth through 23 months, and the reference group is children in the bottom 10% of exposure to estimated cumulative vaccine antigen exposure from birth through 23 months.

**eTable 7.** Association Between Estimated Vaccine Antigen Exposure and Non-Vaccine-Targeted Infections, With Exposures as Estimated Cumulative Vaccine Antigens From Birth Through 23 Months and Estimated Cumulative Vaccine Antigens From Birth Through Index Date (Primary and Secondary Analyses)<sup>a</sup>

| Description of Analysis                                                                                                                                                                                                                                          | Number of cases matched to ≥ 1 control | Total number of matched controls | Exposure: Estimated cumulative vaccine antigens from birth through 23 months |                            |                                                                           | Exposure: Estimated cumulative vaccine antigens from birth to index date of non-vaccine-targeted infection in case |                            |                                                                            |
|------------------------------------------------------------------------------------------------------------------------------------------------------------------------------------------------------------------------------------------------------------------|----------------------------------------|----------------------------------|------------------------------------------------------------------------------|----------------------------|---------------------------------------------------------------------------|--------------------------------------------------------------------------------------------------------------------|----------------------------|----------------------------------------------------------------------------|
|                                                                                                                                                                                                                                                                  |                                        |                                  | Mean (std), among cases                                                      | Mean (std), among controls | Matched odds ratios(mOR) <sup>b</sup> (95% confidence interval)           | Mean (std), among cases                                                                                            | Mean (std), among controls | Matched odds ratio(mOR) <sup>b</sup> (95% confidence interval)             |
| <b>Primary Analysis</b>                                                                                                                                                                                                                                          |                                        |                                  |                                                                              |                            |                                                                           |                                                                                                                    |                            |                                                                            |
| Confirmed cases matched to controls without a non-vaccine-targeted infection diagnosis in an inpatient or emergency department setting. <sup>c</sup> Matching variables: sex, Vaccine Safety Datalink site, chronic condition status, and birthdate (± 2 weeks). | 193                                    | 751                              | 240.6 (48.3)                                                                 | 242.9 (51.1)               | mOR – 1 unit: 0.998 (0.994 - 1.002)<br>mOR – 30 units: 0.94 (0.84 – 1.07) | 252.3 (48.1)                                                                                                       | 252.9 (52.4)               | mOR– 1 unit: 0.999 (0.995 - 1.003)<br>mOR – 30 units: 0.98 (0.86 – 1.10)   |
| <b>Secondary Analyses</b>                                                                                                                                                                                                                                        |                                        |                                  |                                                                              |                            |                                                                           |                                                                                                                    |                            |                                                                            |
| Same as primary analysis, but also excluding controls with non-vaccine-targeted diagnosis in an urgent care setting. <sup>d</sup>                                                                                                                                | 174                                    | 668                              | 239.0 (49.1)                                                                 | 240.3 (53.0)               | mOR– 1 unit: 0.999 (0.995 – 1.003)<br>mOR – 30 units: 0.97 (0.86 – 1.10)  | 250.6 (48.3)                                                                                                       | 250.2 (54.0)               | mOR– 1 unit: 1.000 (0.996 – 1.004)*<br>mOR – 30 units: 1.00 (0.89 – 1.13)* |
| Same as primary analysis, but also excluding controls with non-vaccine-targeted diagnosis in an urgent care setting and matching on race/ethnicity. <sup>d,e</sup>                                                                                               | 145                                    | 525                              | 242.4 (47.2)                                                                 | 243.4 (51.3)               | mOR– 1 unit: 0.999 (0.995 – 1.004)<br>mOR – 30 units: 0.98 (0.85 – 1.13)  | 253.6 (47.6)                                                                                                       | 253.2 (53.4)               | mOR– 1 unit: 1.000 (0.995 – 1.004)<br>mOR – 30 units: 0.99 (0.86 – 1.14)   |



eTable 7, continued

| Description of Analysis                                                                                                                                                                                                                                      | Number of cases matched to ≥ 1 control | Total number of matched controls | Exposure: Estimated cumulative vaccine antigen exposure from birth to age 23 months |                            |                                                                          | Exposure: Estimated cumulative vaccine antigen exposure from birth to index date of non-vaccine-targeted infection in case |                            |                                                                          |
|--------------------------------------------------------------------------------------------------------------------------------------------------------------------------------------------------------------------------------------------------------------|----------------------------------------|----------------------------------|-------------------------------------------------------------------------------------|----------------------------|--------------------------------------------------------------------------|----------------------------------------------------------------------------------------------------------------------------|----------------------------|--------------------------------------------------------------------------|
|                                                                                                                                                                                                                                                              |                                        |                                  | Mean (std), among cases                                                             | Mean (std), among controls | Matched odds ratios(mOR) <sup>b</sup> (95% confidence interval)          | Mean (std), among cases                                                                                                    | Mean (std), among controls | Matched odds ratios(mOR) <sup>b</sup> (95% confidence interval)          |
| Confirmed cases matched to controls with an emergency department visit for an injury from 24 through 47 months. <sup>f</sup> Matching variables: sex, Vaccine Safety Datalink site, chronic condition status and birthdate (± 2 weeks).                      | 168                                    | 579                              | 241.8 (46.7)                                                                        | 244.2 (48.8)               | mOR– 1 unit: 0.999 (0.995 – 1.004)<br>mOR – 30 units: 0.98 (0.85 – 1.13) | 253.6 (46.1)                                                                                                               | 255.0 (50.7)               | mOR– 1 unit: 1.000 (0.995 – 1.004)<br>mOR – 30 units: 0.99 (0.86 – 1.14) |
| Confirmed cases matched to controls with an emergency department visit for an injury from 24 through 47 months. Matching variables: sex, Vaccine Safety Datalink site, chronic condition status, birthdate (± 2 weeks), and race/ethnicity. <sup>e,f,g</sup> | 114                                    | 339                              | 243.7 (47.4)                                                                        | 245.2 (47.9)               | mOR– 1 unit: 1.001 (0.994 – 1.008)<br>mOR – 30 units: 1.03 (0.85 – 1.25) | 254.8 (47.9)                                                                                                               | 255.4 (48.4)               | mOR– 1 unit: 1.001 (0.995 – 1.007)<br>mOR – 30 units: 1.03 (0.85 – 1.25) |

Abbreviations: std, standard deviation; mOR – 1 unit, matched odds ratio with exposure of estimated cumulative vaccine antigen exposure unscaled ; mOR – 30 units, matched odds ratio with estimated cumulative vaccine antigen exposure scaled to 30 unit increments.

<sup>a</sup> For the exposure of estimated cumulative vaccine antigens from birth to index date of non-vaccine-targeted infection in case, vaccine antigens were summed from the child's birthdate through the index date of confirmed non-vaccine-targeted infection in the matched case.

<sup>b</sup> Cases and controls were analyzed with conditional logistic regression to estimate matched odds ratios and 95% confidence intervals. In the models, the dependent variable was case status (yes/no), and the main exposure variable was either estimated cumulative vaccine antigen exposure from birth through 23 months or estimated cumulative vaccine antigen

exposure from birth through the index date of non-vaccine-targeted infection in case. All models were adjusted for the number of outpatient visits from birth through age 23 months. For all models except for the one indicated with a \*, the Hosmer-Lemeshow goodness of fit test indicated adequate model fit ( $p>0.05$ ). For the model with a \*, the model was run again with a log-transformation of the exposure variable of estimated cumulative vaccine antigen exposure from birth to index date of non-vaccine-targeted infection in case. In this model, the association was non-significant (OR for log-transformed predictor variable, unscaled: 1.20 [95% confidence interval: 0.69 – 2.09]), and the Hosmer-Lemeshow test indicated adequate model fit ( $p=0.18$ ). For all models, Box-Tidwell tests did not indicate deviation from linearity of the logit ( $p>0.05$  for all models).

<sup>c</sup> Risk set sampling was used for case-control matching. For the primary analysis, eligible controls were randomly selected from the cohort and did not have an inpatient or emergency department record of a non-vaccine-targeted infection prior to the index date. Both cases and controls were required to be continuously enrolled in the integrated health plan through the index date.

<sup>d</sup> Risk set sampling was used for case-control matching. For this secondary analysis, eligible controls were randomly selected from the cohort and did not have an inpatient, emergency department, or urgent care record of a non-vaccine-targeted infection from 24 through 47 months prior to the index date. Cases with an urgent care visit for a non-vaccine-targeted infection prior to their emergency department or inpatient visit for non-vaccine-targeted infection were excluded from analysis ( $n=19$ ).

<sup>e</sup> Race/ethnicity was categorized into six mutually exclusive groups: Hispanic, any race ( $n=40$ , 20.7% of cases); White ( $n=97$ , 50.3% of cases); Black ( $n=9$ , 4.7% of cases); Asian ( $n=11$ , 5.7% of cases); Multiracial ( $n=10$ , 5.2% of cases); or Other reported race ( $n=1$ , 0.5% of cases). Race/ethnicity was missing for  $n=25$  cases (13.0% of cases). In this analysis,  $n=19$  cases were first excluded due to having an urgent care visit for a non-vaccine-targeted infection prior to their emergency department or inpatient visit for non-vaccine-targeted infection, and an additional  $n=21$  cases were then excluded due to missing race. An additional  $n=8$  cases had race/ethnicity data available, but no eligible control match, and were excluded from analysis.

<sup>f</sup> Risk set sampling was used for case-control matching. For this secondary analysis, controls were selected from a subset of cohort members who had an emergency department visit for an injury from 24 through 47 months. This subset of controls consisted of  $n=53,215$  children (10.7% of the initial study cohort). Emergency department visits for injuries were identified using International Classification of Diseases (ICD), 9<sup>th</sup> addition, Clinical Modification (ICD-9-CM codes) 800.x – 999.x, excluding 960.x – 979.x. The corresponding ICD-10 codes were also identified for encounters from October through December 2015. These codes represent encounters for fractures; dislocations; sprains and strains of joints and adjacent muscles; intracranial injuries; internal injuries of thorax, abdomen and pelvis; open wounds; injury to blood vessels; late effects of injuries, poisoning, toxic effects and other external causes; superficial injuries; contusions; foreign bodies; burns; other injuries; certain traumatic complications and unspecified injuries; toxic effects of substances chiefly nonmedicinal as to source; other and unspecified effects of external causes; and complications of surgical and medical care, not elsewhere classified.

<sup>g</sup> In this analysis,  $n=25$  children did not have any eligible matches from the control group regardless of the race/ethnicity matching criterion; race/ethnicity was missing for an additional  $n=23$  cases, and an additional  $n=31$  cases did have race/ethnicity data but did not have a match based on other matching criteria. These  $n=79$  cases without a control match were excluded from analysis.

**eTable 8.** Association Between Estimated Vaccine Antigen Exposure and Non-Vaccine-Targeted Infections, With Exposures as Estimated Maximum Single-Day Vaccine Antigens From Birth Through 23 months and Estimated Maximum Single-Day Vaccine Antigens From Birth Through Index Date (Primary and Secondary Analyses)<sup>a</sup>

| Description of Analysis                                                                                                                                                                                                                                          | Number of cases matched to ≥ 1 control | Total number of matched controls | Exposure: Estimated maximum single day vaccine antigens from birth to age 23 months |                            |                                                                                           | Exposure: Estimated maximum single-day vaccine antigens from birth to index date of non-vaccine-targeted infection in case |                            |                                                                                           |
|------------------------------------------------------------------------------------------------------------------------------------------------------------------------------------------------------------------------------------------------------------------|----------------------------------------|----------------------------------|-------------------------------------------------------------------------------------|----------------------------|-------------------------------------------------------------------------------------------|----------------------------------------------------------------------------------------------------------------------------|----------------------------|-------------------------------------------------------------------------------------------|
|                                                                                                                                                                                                                                                                  |                                        |                                  | Mean (std), among cases                                                             | Mean (std), among controls | Matched odds ratios(mOR) <sup>b</sup> (95% confidence interval)                           | Mean (std), among cases                                                                                                    | Mean (std), among controls | Matched odds ratio(mOR) <sup>b</sup> (95% confidence interval)                            |
| <b>Primary Analysis</b>                                                                                                                                                                                                                                          |                                        |                                  |                                                                                     |                            |                                                                                           |                                                                                                                            |                            |                                                                                           |
| Confirmed cases matched to controls without a non-vaccine-targeted infection diagnosis in an inpatient or emergency department setting. <sup>c</sup> Matching variables: sex, Vaccine Safety Datalink site, chronic condition status, and birthdate (± 2 weeks). | 193                                    | 751                              | 101.0 (18.4)                                                                        | 100.5 (18.9)               | mOR– 1 unit:<br>1.002<br>(0.993 – 1.012)<br><br>mOR – 30 units:<br>1.07<br>(0.81 – 1.41)  | 102.1 (16.5)                                                                                                               | 100.8 (18.0)               | mOR– 1 unit:<br>1.005<br>(0.995 – 1.016)<br><br>mOR – 30 units:<br>1.17<br>(0.86 – 1.60)  |
| <b>Secondary Analyses</b>                                                                                                                                                                                                                                        |                                        |                                  |                                                                                     |                            |                                                                                           |                                                                                                                            |                            |                                                                                           |
| Same as primary analysis, but also excluding controls with non-vaccine-targeted diagnosis in an urgent care setting. <sup>d</sup>                                                                                                                                | 174                                    | 668                              | 100.5 (18.9)                                                                        | 99.7 (19.7)                | mOR – 1 unit:<br>1.003<br>(0.994 – 1.013)<br><br>mOR – 30 units:<br>1.10<br>(0.83 – 1.47) | 101.7 (17.0)                                                                                                               | 100.4 (18.3)               | mOR – 1 unit:<br>1.006<br>(0.995 – 1.016)<br><br>mOR – 30 units:<br>1.19<br>(0.87 – 1.63) |
| Same as primary analysis, but also excluding controls with non-vaccine-targeted diagnosis in an urgent care setting and matching on race/ethnicity. <sup>d,e</sup>                                                                                               | 145                                    | 525                              | 101.6 (17.9)                                                                        | 100.4 (19.4)               | mOR – 1 unit:<br>1.006<br>(0.994 – 1.018)<br><br>mOR – 30 units:<br>1.19<br>(0.84 – 1.69) | 102.4 (16.3)                                                                                                               | 100.8 (18.4)               | mOR – 1 unit:<br>1.008<br>(0.995 – 1.021)<br><br>mOR – 30 units:<br>1.25<br>(0.85 – 1.84) |

eTable 8, continued

| Description of Analysis                                                                                                                                                                                                                        | Number of cases matched to ≥ 1 control | Total number of matched controls | Exposure: Maximum single day vaccine antigens from birth to age 23 months |                            |                                                                           | Exposure: Maximum single day vaccine antigens from birth to index date of non-vaccine-targeted infection in case |                            |                                                                           |
|------------------------------------------------------------------------------------------------------------------------------------------------------------------------------------------------------------------------------------------------|----------------------------------------|----------------------------------|---------------------------------------------------------------------------|----------------------------|---------------------------------------------------------------------------|------------------------------------------------------------------------------------------------------------------|----------------------------|---------------------------------------------------------------------------|
|                                                                                                                                                                                                                                                |                                        |                                  | Mean (std), among cases                                                   | Mean (std), among controls | Matched odds ratios(mOR) <sup>b</sup> (95% confidence interval)           | Mean (std), among cases                                                                                          | Mean (std), among controls | Matched odds ratios(mOR) <sup>b</sup> (95% confidence interval)           |
| Confirmed cases matched to controls with an emergency department visit for an injury from 24 through 47 months. <sup>f</sup> Matching variables: sex, Vaccine Safety Datalink site, chronic condition status and birthdate (± 2 weeks).        | 168                                    | 579                              | 101.8 (16.8)                                                              | 101.5 (18.5)               | mOR – 1 unit: 1.004 (0.994 – 1.015)<br>mOR – 30 units: 1.14 (0.83 – 1.57) | 103.0 (14.5)                                                                                                     | 101.9 (17.6)               | mOR – 1 unit: 1.009 (0.996 – 1.021)<br>mOR – 30 units: 1.29 (0.89 – 1.87) |
| Confirmed cases matched to controls with an ED visit for an injury from 24 through 47 months. Matching variables: sex, Vaccine Safety Datalink site, chronic condition status, and birthdate (± 2 weeks), and race/ethnicity. <sup>e,f,g</sup> | 114                                    | 339                              | 102.0 (16.8)                                                              | 101.9 (18.5)               | mOR – 1 unit: 1.004 (0.990 – 1.017)<br>mOR – 30 units: 1.12 (0.75 – 1.68) | 102.7 (15.2)                                                                                                     | 102.4 (17.2)               | mOR – 1 unit: 1.005 (0.990 – 1.020)<br>mOR – 30 units: 1.15 (0.74 – 1.79) |

Abbreviations: std, standard deviation; mOR – 1 unit, matched odds ratio with exposure of estimated maximum single day vaccine antigen exposure unscaled; mOR – 30 units, matched odds ratio with exposure of estimated maximum single day vaccine antigen exposure scaled to 30 unit increments.

<sup>a</sup> For the exposure of estimated cumulative vaccine antigens from birth to index date of non-vaccine-targeted infection in case, vaccine antigens were summed from the child's birthdate through the index date of confirmed non-vaccine-targeted infection in the matched case.

<sup>b</sup> Cases and controls were analyzed with conditional logistic regression to estimate matched odds ratios (mOR) and 95% confidence intervals. In the models, the dependent variable was case status (yes/no), and the main exposure variable was either estimated maximum single day vaccine antigen exposure before the child's 2nd birthday or estimated maximum single day vaccine antigen exposure from birth to index date of non-vaccine-targeted infection in case. We present these results with the exposure variables unscaled, and also with

the exposure variables scaled to 30 unit increments of vaccine antigen exposure. All models were adjusted for the number of outpatient visits from birth through age 23 months. For all models, the Hosmer-Lemeshow goodness of fit test indicated adequate model fit ( $p>0.05$ ) and Box-Tidwell test did not indicate deviation from linearity of the logit ( $p>0.05$  for all models).

<sup>c</sup> Risk set sampling was used for case-control matching. For the primary analysis, eligible controls were randomly selected from the cohort and did not have an inpatient or emergency department record of a non-vaccine-targeted infection prior to the index date.

<sup>d</sup> Risk set sampling was used for case-control matching. For this secondary analysis, eligible controls were randomly selected from the cohort and did not have an inpatient, emergency department, or urgent care record of a non-vaccine-targeted infection from 24 through 47 months prior to the index date. Cases with an urgent care visit for a non-vaccine-targeted infection prior to their emergency department or inpatient visit for non-vaccine-targeted infection were excluded from analysis ( $n=19$ ).

<sup>e</sup> Race/ethnicity was categorized into six mutually exclusive groups: Hispanic, any race ( $n=40$ , 20.7% of cases); White ( $n=97$ , 50.3% of cases); Black ( $n=9$ , 4.7% of cases); Asian ( $n=11$ , 5.7% of cases); Multiracial ( $n=10$ , 5.2% of cases); or Other reported race ( $n=1$ , 0.5% of cases). Race/ethnicity was missing for  $n=25$  cases (13.0% of cases). In this analysis,  $n=19$  cases were first excluded due to having an urgent care visit for a non-vaccine-targeted infection prior to their emergency department or inpatient visit for non-vaccine-targeted infection, and an additional  $n=21$  cases were then excluded due to missing race. An additional  $n=8$  cases has race/ethnicity data available, but no eligible control match, and were excluded from analysis.

<sup>f</sup> Risk set sampling was used for case-control matching. For this secondary analysis, controls were selected from a subset of cohort members who had an emergency department visit for an injury between 24 through 47 months. This subset of controls consisted of  $n=53,215$  children (10.7% of the initial study cohort). Emergency department visits for injuries were identified using International Classification of Diseases (ICD), 9<sup>th</sup> addition, Clinical Modification (ICD-9-CM codes) 800.x – 999.x, excluding 960.x – 979.x. The corresponding ICD-10 codes were also identified for encounters from October through December 2015. These codes represent encounters for fractures; dislocations; sprains and strains of joints and adjacent muscles; intracranial injuries; internal injuries of thorax, abdomen and pelvis; open wounds; injury to blood vessels; late effects of injuries, poisoning, toxic effects and other external causes; superficial injuries; contusions; foreign bodies; burns; other injuries; certain traumatic complications and unspecified injuries; toxic effects of substances chiefly nonmedicinal as to source; other and unspecified effects of external causes; and complications of surgical and medical care, not elsewhere classified.

<sup>g</sup>In this analysis,  $n=25$  children did not have any eligible matches from the control group regardless of the race/ethnicity matching criterion; race/ethnicity was missing for an additional  $n=23$  cases, and an additional  $n=31$  cases did have race/ethnicity data but did not have a match based on other matching criteria. These  $n=79$  cases without a control match were excluded from analysis.

**eTable 9.** Association Between Estimated Vaccine Antigen Exposure and Non-Vaccine-Targeted Infections, With Exposures as Estimated Cumulative Vaccine Antigens and Estimated Maximum Single-Day Vaccine Antigens From Birth Through 23 Months, (a) Stratified by Chronic Condition Status, (b) Stratified by Outcome Setting, (c) Excluding Children Who Did Not Receive Varicella Vaccination, and (d) Excluding Children Who Received No Vaccines From Birth Through 23 Months (Secondary Analyses)

| Description of Secondary Analysis                                                                                      | Number of cases with $\geq 1$ match to control | Total number of controls matched to a case | <u>Exposure: Estimated cumulative vaccine antigen exposure from birth through 23 months</u> |                            |                                                                             | <u>Exposure: Estimated maximum single-day vaccine antigens from birth through 23 months</u> |                            |                                                                           |
|------------------------------------------------------------------------------------------------------------------------|------------------------------------------------|--------------------------------------------|---------------------------------------------------------------------------------------------|----------------------------|-----------------------------------------------------------------------------|---------------------------------------------------------------------------------------------|----------------------------|---------------------------------------------------------------------------|
|                                                                                                                        |                                                |                                            | Mean (std), among cases                                                                     | Mean (std), among controls | Matched odds ratio <sup>a</sup> (95% confidence interval)                   | Mean (std), among cases                                                                     | Mean (std), among controls | Matched odds ratio <sup>a</sup> (95% confidence interval)                 |
| <b>(a) Stratified by chronic condition</b>                                                                             |                                                |                                            |                                                                                             |                            |                                                                             |                                                                                             |                            |                                                                           |
| Same as primary analysis <sup>b</sup> , but restricted only to children without a chronic condition                    | 140                                            | 560                                        | 242.9 (46.3)                                                                                | 243.8 (52.6)               | mOR – 1 unit: 0.999 (0.994 – 1.003)<br>mOR – 30 units: 0.97 (0.84 – 1.11)   | 101.9 (17.0)                                                                                | 100.7 (19.2)               | mOR – 1 unit: 1.003 (0.992 – 1.015)<br>mOR – 30 units: 1.11 (0.79 – 1.55) |
| Same as primary analysis <sup>b</sup> , but restricted only to children with non-complex or complex chronic conditions | 53                                             | 191                                        | 234.5 (53.3)                                                                                | 240.5 (46.2)               | mOR – 1 unit: 0.996 (0.988 – 1.004)*<br>mOR – 30 units: 0.88 (0.69 – 1.12)* | 98.7 (21.6)                                                                                 | 99.7 (17.8)                | mOR – 1 unit: 0.999 (0.982 – 1.016)<br>mOR – 30 units: 0.97 (0.57 – 1.63) |
| <b>(b) Stratified by outcome setting</b>                                                                               |                                                |                                            |                                                                                             |                            |                                                                             |                                                                                             |                            |                                                                           |
| Same as primary analysis <sup>b</sup> , but restricted to cases from the inpatient setting <sup>c</sup>                | 85                                             | 331                                        | 237.1 (53.4)                                                                                | 242.9 (50.7)               | mOR – 1 unit: 0.997 (0.991 – 1.002)<br>mOR – 30 units: 0.91 (0.77 – 1.07)   | 97.9 (21.3)                                                                                 | 98.7 (19.2)                | mOR – 1 unit: 0.999 (0.987 – 1.011)<br>mOR – 30 units: 0.97 (0.67 – 1.40) |

eTable 9, continued

| Description of Secondary Analysis                                                                                            | Number of cases with $\geq 1$ match to control | Total number of controls matched to a case | Exposure: Estimated cumulative vaccine antigen exposure from birth through 23 months |                            |                                                                               | Exposure: Maximum single day vaccine antigens from birth through 23 months |                            |                                                                               |
|------------------------------------------------------------------------------------------------------------------------------|------------------------------------------------|--------------------------------------------|--------------------------------------------------------------------------------------|----------------------------|-------------------------------------------------------------------------------|----------------------------------------------------------------------------|----------------------------|-------------------------------------------------------------------------------|
|                                                                                                                              |                                                |                                            | Mean (std), among cases                                                              | Mean (std), among controls | Matched odds ratio <sup>a</sup> (95% confidence interval)                     | Mean (std), among cases                                                    | Mean (std), among controls | Matched odds ratio <sup>a</sup> (95% confidence interval)                     |
| Same as primary analysis <sup>b</sup> , but restricted to cases from the emergency department setting                        | 108                                            | 420                                        | 243.3 (44.1)                                                                         | 243.0 (51.4)               | mOR – 1 unit: 1.000 (0.994 – 1.006)<br><br>mOR – 30 units: 0.99 (0.83 – 1.18) | 103.4 (15.4)                                                               | 101.8 (18.5)               | mOR – 1 unit: 1.006 (0.992 – 1.021)<br><br>mOR – 30 units: 1.21 (0.78 – 1.89) |
| <b>(c) Excluding children without varicella vaccination</b>                                                                  |                                                |                                            |                                                                                      |                            |                                                                               |                                                                            |                            |                                                                               |
| Same as primary analysis <sup>b</sup> , but excluding children who did not receive varicella vaccine <sup>d</sup>            | 184                                            | 682                                        | 246.8 (38.4)                                                                         | 249.4 (41.3)               | mOR – 1 unit: 0.992 (0.983 – 1.001)<br><br>mOR – 30 units: 0.79 (0.60 – 1.03) | 104.1 (11.4)                                                               | 104.0 (11.1)               | mOR – 1 unit: 1.002 (0.985 – 1.020)<br><br>mOR – 30 units: 1.07 (0.63 – 1.81) |
| <b>(d) Excluding completely unvaccinated children</b>                                                                        |                                                |                                            |                                                                                      |                            |                                                                               |                                                                            |                            |                                                                               |
| Same as primary analysis <sup>b</sup> , but excluding children who did not receive any vaccines from birth through 23 months | 193                                            | 749                                        | 240.6 (48.3)                                                                         | 243.6 (49.6)               | mOR – 1 unit: 0.998 (0.993 – 1.002)<br><br>mOR – 30 units: 0.93 (0.82 – 1.05) | 101.0 (18.4)                                                               | 100.7 (18.1)               | mOR – 1 unit: 1.001 (0.992 – 1.011)<br><br>mOR – 30 units: 1.04 (0.78 – 1.39) |

Abbreviations: std, standard deviation; mOR – 1 unit, matched odds ratio with exposure of cumulative vaccine antigens or maximum single day vaccine antigens unscaled; mOR – 30 units, matched odds ratio with exposure of estimated cumulative vaccine antigens or maximum single day vaccine antigens exposure scaled to 30 unit increments.

<sup>a</sup> Cases and controls were analyzed with conditional logistic regression to estimate matched odds ratios (mOR) and 95% confidence intervals. In the models, the dependent variable was case status (yes/no), and the main exposure variable was either estimated cumulative vaccine antigen exposure or maximum single day vaccine exposure before the child's 2nd birthday. All models were adjusted for the number of outpatient visits from birth through 23 months. For all models except for the one indicated with a \*, the Hosmer-Lemeshow goodness of fit test indicated adequate model fit ( $p > 0.05$ ). For the model with a \*, the model was run again with a log-transformation of the exposure variable of estimated cumulative vaccine antigen exposure from birth through 23 months. In this model, the association was non-significant (OR for log-transformed exposure variable, unscaled: 0.50 [95% confidence interval: 0.14 – 1.81]), and the Hosmer-Lemeshow test indicated adequate model fit ( $p = 0.25$ ). For all models, Box-Tidwell tests did not indicate deviation from linearity of the logit ( $p > 0.05$  for all models).

<sup>b</sup> The primary analysis consisted of confirmed cases matched to controls without a non-vaccine-targeted infection diagnosis in an inpatient or emergency department setting. Matching variables were: sex, Vaccine Safety Datalink site, chronic condition status, and birthdate ( $\pm 2$  weeks).

<sup>c</sup> This analysis including 85 inpatient patients had 80% power to detect an odds ratio (scaled to 30 unit increments) of 1.24, calculated assuming an alpha of 0.05, r-squared value of 0.20, a 1:4 case to control ratio and a standard deviation for estimated cumulative vaccine antigen exposure of 1.79. The standard deviation was calculated from the cohort prior to selecting cases and controls, and represents the standard deviation for estimated cumulative antigen exposure scaled to 30 unit increments. The power analysis was conducted using PASS 15.0.2 software (Online-only supplement references 13-15).

<sup>d</sup> In this analysis, matched strata (both the case and matched controls) were removed if the case had not received the varicella vaccine. In other strata, controls who had not received the varicella vaccine were also removed from the analysis.



**eTable 10: Race/Ethnicity of Study-Eligible Cohort Members and of Cases and Controls From Secondary Analysis Matching on Race/Ethnicity**

|                       |                      | <b>Nested case-control</b> |                     |
|-----------------------|----------------------|----------------------------|---------------------|
|                       | <b>Entire Cohort</b> | <b>Cases</b>               | <b>Controls</b>     |
|                       | <b>N=495,193</b>     | <b>N=145<sup>a</sup></b>   | <b>N=525</b>        |
| <b>Race/ethnicity</b> | <b>n (column %)</b>  | <b>n (column %)</b>        | <b>n (column %)</b> |
| Hispanic, any race    | 154,818 (31.3%)      | 39 (26.9%)                 | 147 (28.0%)         |
| White                 | 171,003 (34.5%)      | 85 (58.6%)                 | 310 (59.1%)         |
| Black                 | 23,453 (4.7%)        | 6 (4.1%)                   | 14 (2.7%)           |
| Asian                 | 62,872 (12.7%)       | 8 (5.5%)                   | 32 (6.1%)           |
| Multiracial           | 11,954 (2.4%)        | 6 (4.1%)                   | 21 (4.0%)           |
| Other reported race   | 16,929 (3.4%)        | 1 (0.7%)                   | 1 (0.2%)            |
| Missing               | 54,164 (10.9%)       | n/a                        | n/a                 |

<sup>a</sup>The cases and controls presented in this table are from a secondary analysis excluding controls with a non-vaccine-targeted diagnosis in an urgent care setting and matching on race/ethnicity. For this analysis, of the n=193 cases from the primary analysis, n=19 cases were first excluded due to having an urgent care visit for a non-vaccine-targeted infection prior to their emergency department or inpatient visit for a non-vaccine-targeted infection. Then, an additional n=21 cases were excluded due to missing race. An additional n=8 cases had race/ethnicity data available, but no eligible control match. Results from this secondary analysis are shown in eTables 8 and 9.

## eReferences

1. Sørup S, Benn CS, Poulsen A, Krause TG, Aaby P, Ravn H. Live vaccine against measles, mumps, and rubella and the risk of hospital admissions for nontargeted infections. *JAMA*. 2014; 311(8):826-35.
2. Reef SE, Cochi SL. The evidence for the elimination of rubella and congenital rubella syndrome in the United States: a public health achievement. *Clin Infect Dis*. 2006; 43 Suppl 3:S123-5.
3. Centers for Disease Control and Prevention (CDC). Certification of poliomyelitis eradication--the Americas, 1994. *MMWR Morb Mortal Wkly Rep*. 1994;43(39):720-722.
4. Strikas, RA. Advisory Committee on Immunization Practices Recommended Immunization Schedules for Persons Aged 0 Through 18 Years — United States, 2015. *MMWR Morb Mortal Wkly Rep*. 2015; 64(04):93-94.
5. Iqbal S, Barile J, Thompson W, DeStefano F. Number of antigens in early childhood vaccines and neuropsychological outcomes at age 7–10 years. *Pharmacoepidemiol Drug Saf*. 2013;22(12):1263-1270.
6. Plotkin SA, Orenstein W, Offit PA, Edwards KM. *Vaccines*. 7th ed. Philadelphia, PA: Saunders; 2017.
7. Harper SA, Fukuda K, Uyeki TM, Cox NJ, Bridges CB. Prevention and control of influenza: recommendations of the Advisory Committee on Immunization Practices (ACIP). *MMWR Recomm Rep*. 2004;53:1– 40
8. Cortese MM, Parashar UD; Centers for Disease Control and Prevention (CDC). Prevention of rotavirus gastroenteritis among infants and children: recommendations of the Advisory Committee on Immunization Practices (ACIP). *MMWR Recomm Rep*. 2009; 58(RR-2):1-25.
9. Fiore AE, Wasley A, Bell BP. Prevention of Hepatitis A through active or passive immunization: recommendations of the Advisory Committee on Immunization Practices (ACIP). *MMWR Recomm Rep*. 2006; 55(RR-7):1-23.
10. National Center for Immunization and Respiratory Diseases, CDC; Centers for Disease Control and Prevention (CDC). Use of influenza A (H1N1) 2009 monovalent vaccine: recommendations of the Advisory Committee on Immunization Practices (ACIP), 2009. *MMWR Recomm Rep*. 2009; 58(RR-10):1-8.
11. Nuorti JP, Whitney CG; Centers for Disease Control and Prevention (CDC). Prevention of pneumococcal disease among infants and children—use of 13-valent pneumococcal conjugate vaccine and 23-valent pneumococcal polysaccharide vaccine: recommendations of the Advisory Committee on Immunization Practices (ACIP). *MMWR Recomm Rep*. 2010; 59(RR-11):1-18.
12. Lash TL, Fox MP, Fink AK. *Applying Quantitative Bias Analysis to Epidemiologic Data*. New York, NY: Springer Science & Business Media; 2011.
13. Lachin, John M. Sample size evaluation for a multiply matched case-control study using the score test from a conditional logistic (discrete Cox PH) regression model. 27:2509-2523. *Statistics in Medicine*. New York, NY: John Wiley & Sons; 2008.
14. Lachin, JM. *Biostatistical Methods: The Assessment of Relative Risks*. 2<sup>nd</sup> ed. New York, NY:

John Wiley & Sons; 2011.

15. Tang, Yongqiang. Comments on 'Sample size evaluation for multiply matched case-control study using the score test from a conditional logistic (discrete Cox PH) regression model.' 28:175-177. *Statistics in Medicine*, New York, NY: John Wiley & Sons; 2009.
